# Supplementary material for: Temporally specific gene expression and chromatin remodeling programs regulate a conserved Pdyn enhancer
Source: eLife. 2023 Nov 8;12:RP89993. doi: 10.7554/eLife.89993 (PMC10631760; doi:10.7554/eLife.89993)
Supplement: Figure 5—source data 1. [file elife-89993-fig5-data1.xlsx]

## Sheet: Experiment 1
Experiment 1 - Figure 5D
	1	2	3	4	5	6	7	8	9	10	11	12
A	20.11	20.07	19.43	19.67	33.08	33.13	26.57	26.65	29.56	29.56	28.14	28.23		Primers:
B	19.97	19.92	19.7	19.82	34.08	33.15	22.12	22.13	29.57	29.63	29.49	29.63		Gapdh
C	20.05	19.73	19.55	19.58	32.89	33.2	22.08	22.02	29.27	29.26	29.44	29.55		FosB
D	20.01	19.86	19.78	19.86	26.17	26.1	22.47	22.47	29.65	29.73	30.09	30.03		Pdyn
E	19.94	19.75	N/A	N/A	25.76	25.99	N/A	N/A	29.42	29.35	N/A	N/A
F	19.84	19.61	N/A	N/A	26.15	26.09	N/A	N/A	29.85	29.68	N/A	N/A
G	19.65	19.44	N/A	N/A	26.55	26.92	N/A	N/A	27.84	27.82	N/A	N/A
H	19.89	19.72	N/A	N/A	26.58	26.58	N/A	N/A	28.19	28.01	N/A	N/A
Gapdh
DMSO + Veh	R1	R2	Average		Diff-Veh Avg	Relative Enrichment	Normalized		FosB
	20.11	20.07	20.09		0.115	0.923382	0.921821		DMSO + Veh	R1	R2	Average		Gapdh Averages	Ct(samples)-Ct(Gapdh)	Diff Avg	Relative enrichment	Normalized
	19.97	19.92	19.945		-0.03	1.02101	1.01929			33.08	33.13	33.105		20.09	13.015	-0.265	1.20164	1.1799
	20.05	19.73	19.89		-0.085	1.06069	1.05889			34.08	33.15	33.615		19.945	13.67	0.39	0.76313	0.749324
			19.975			1.00169	1			32.89	33.2	33.045		19.89	13.155	-0.125	1.09051	1.07078
												33.255			13.28		1.01842	1
Aniso + Veh	R1	R2	Average		Diff-Veh Avg	Relative Enrichment	Normalized
	20.01	19.86	19.86		-0.115	1.08298	1.08114		Aniso + Veh	R1	R2	Average		Gapdh Averages	Ct(samples)-Ct(Gapdh)	Diff Avg	Relative enrichment	Normalized
	19.94	19.75	19.845		-0.13	1.09429	1.09244			26.17	26.1	26.135		19.86	6.275	-7.005	128.444	126.121
	19.84	19.61	19.725		-0.25	1.18921	1.1872			25.76	25.99	25.875		19.845	6.03	-7.25	152.219	149.465
			19.81			1.12216	1.12026			26.15	26.09	26.12		19.725	6.395	-6.885	118.193	116.055
												26.0433			6.23333		132.952	130.547
DMSO + KCl	R1	R2	Average		Diff-Veh Avg	Relative Enrichment	Normalized
	19.65	19.44	19.545		-0.43	1.34723	1.34496		DMSO + KCl	R1	R2	Average		Gapdh Averages	Ct(samples)-Ct(Gapdh)	Diff Avg	Relative enrichment	Normalized
	19.89	19.72	19.805		-0.17	1.12506	1.12316			26.55	26.92	26.735		19.545	7.19	-6.09	68.1197	66.8873
	19.43	19.67	19.55		-0.425	1.34257	1.3403			26.58	26.58	26.58		19.805	6.775	-6.505	90.8239	89.1808
			19.6333			1.27162	1.26947			26.57	26.65	26.61		19.55	7.06	-6.22	74.5429	73.1944
												26.6417			7.00833		77.8288	76.4208
Aniso + KCl	R1	R2	Average		Diff-Veh Avg	Relative Enrichment	Normalized
	19.7	19.82	19.76		-0.215	1.1607	1.15874		Aniso + KCl	R1	R2	Average		Gapdh Averages	Ct(samples)-Ct(Gapdh)	Diff Avg	Relative enrichment	Normalized
	19.55	19.58	19.565		-0.41	1.32869	1.32644			22.12	22.13	22.125		19.76	2.365	-10.915	1930.82	1895.89
	19.78	19.86	19.82		-0.155	1.11342	1.11154			22.08	22.02	22.05		19.565	2.485	-10.795	1776.72	1744.58
			19.715			1.20094	1.19891			22.47	22.47	22.47		19.82	2.65	-10.63	1584.71	1556.04
												22.215			2.5		1764.08	1732.17
Pdyn
DMSO + Veh	R1	R2	Average		Gapdh Averages	Ct(samples)-Ct(Gapdh)	Diff Avg	Relative enrichment	Normalized
	29.56	29.56	29.56		20.09	9.47	-0.03	1.02101	1.01774
	29.57	29.63	29.6		19.945	9.655	0.155	0.898132	0.895252
	29.27	29.26	29.265		19.89	9.375	-0.125	1.09051	1.08701
			29.475			9.5		1.00322	1
Aniso + Veh	R1	R2	Average		Gapdh Averages	Ct(samples)-Ct(Gapdh)	Diff Avg	Relative enrichment	Normalized
	29.65	29.73	29.69		19.86	9.83	0.33	0.795536	0.792985
	29.42	29.35	29.385		19.845	9.54	0.04	0.972655	0.969536
	29.85	29.68	29.765		19.725	10.04	0.54	0.687771	0.685565
			29.6133			9.80333		0.818654	0.816029
DMSO + KCl	R1	R2	Average		Gapdh Averages	Ct(samples)-Ct(Gapdh)	Diff Avg	Relative enrichment	Normalized
	27.84	27.82	27.83		19.545	8.285	-1.215	2.32141	2.31396
	28.19	28.01	28.1		19.805	8.295	-1.205	2.30537	2.29798
	28.14	28.23	28.185		19.55	8.635	-0.865	1.82134	1.8155
			28.0383			8.405		2.14937	2.14248
Aniso + KCl	R1	R2	Average		Gapdh Averages	Ct(samples)-Ct(Gapdh)	Diff Avg	Relative enrichment	Normalized
	29.49	29.63	29.56		19.76	9.8	0.3	0.812252	0.809647
	29.44	29.55	29.495		19.565	9.93	0.43	0.742262	0.739881
	30.09	30.03	30.06		19.82	10.24	0.74	0.598739	0.596819
			2			9.99		0.717751	0.715449

## Sheet: Experiment 2
Experiment 2 - Figure 5D
	1	2	3	4	5	6	7	8	9	10	11	12	Primers
A	21.04	21.24	20.29	20.15	20.23	20.25	36.41	35.33	32.18	32.06	31.14	31.24	Gapdh
B	20.19	20.19	20.08	20.01	20.15	20.11	30.71	31.05	31.76	31.64	30.54	30.64	Pdyn
C	20.13	20.01	20.32	20.18	20.45	20.39	30.96	31.09	32.02	32.08	36.03	38.09
D	20.35	20.37	20.08	20.01	20.69	20.83	30.73	31.11	31.97	32.01	38.94	38.61
E	20.02	19.85	20.74	20.55	20.54	20.41	31.01	31.19	30.23	30.32	36.02	36.43
F	20.41	20.49	20.09	20.17	20.17	20.29	31.25	31.2	29.93	29.82	31.95	32.16
G	20.02	20.27	20.15	19.91	20.21	20.29	32.19	32.24	30.21	30.29	32.44	32.47
H	20.38	20.38	20.08	20.12	20.28	19.91	32.5	32.23	31.15	31.01	33.49	33.23
Gapdh									Pdyn
DMSO + Veh	R1	R2	Average		Diff-Veh Avg	Relative Enrichment	Normalized		DMSO + Veh	R1	R2	Average		Gapdh Averages	Ct(samples)-Ct(Gapdh)	Diff Avg	Relative enrichment	Normalized
	20.19	20.19	20.19		-0.011	1.00765	0.9992			30.71	31.05	30.88		20.19	10.69	-0.139	1.10114	1.08962
	20.13	20.01	20.07		-0.131	1.09505	1.08587			30.96	31.09	31.025		20.07	10.955	0.126	0.916369	0.906783
	20.35	20.37	20.36		0.159	0.895646	0.888132			30.73	31.11	30.92		20.36	10.56	-0.269	1.20497	1.19237
	20.02	19.85	19.935		-0.266	1.20247	1.19238			31.01	31.19	31.1		19.935	11.165	0.336	0.792235	0.783947
	20.41	20.49	20.45		0.249	0.841479	0.83442			31.25	31.2	31.225		20.45	10.775	-0.054	1.03814	1.02728
			20.201			1.00846	1					31.03			10.829		1.01057	1
Aniso + Veh	R1	R2	Average		Diff-Veh Avg	Relative Enrichment	Normalized		Aniso + Veh	R1	R2	Average		Gapdh Averages	Ct(samples)-Ct(Gapdh)	Diff Avg	Relative enrichment	Normalized
	20.02	20.27	20.145		-0.056	1.03958	1.03086			32.19	32.24	32.215		20.145	12.07	1.241	0.423079	0.418654
	20.38	20.38	20.38		0.179	0.883315	0.875905			32.5	32.23	32.365		20.38	11.985	1.156	0.448755	0.444061
	20.29	20.15	20.22		0.019	0.986917	0.978637			32.18	32.06	32.12		20.22	11.9	1.071	0.475989	0.47101
	20.08	20.01	20.045		-0.156	1.11419	1.10485			31.76	31.64	31.7		20.045	11.655	0.826	0.564091	0.55819
	20.32	20.18	20.25		0.049	0.966606	0.958497			32.02	32.08	32.05		20.25	11.8	0.971	0.510152	0.504816
	20.08	20.01	20.045		-0.156	1.11419	1.10485			31.97	32.01	31.99		20.045	11.945	1.116	0.461371	0.456545
			20.1808			1.01747	1.00893					32.0733			11.8925		0.480573	0.475546
DMSO + KCl	R1	R2	Average		Diff-Veh Avg	Relative Enrichment	Normalized		DMSO + KCl	R1	R2	Average		Gapdh Averages	Ct(samples)-Ct(Gapdh)	Diff Avg	Relative enrichment	Normalized
	20.74	20.55	20.645		0.444	0.735094	0.728927			30.23	30.32	30.275		20.645	9.63	-1.199	2.2958	2.27179
	20.09	20.17	20.13		-0.071	1.05044	1.04163			29.93	29.82	29.875		20.13	9.745	-1.084	2.11991	2.09773
	20.15	19.91	20.03		-0.171	1.12584	1.11639			30.21	30.29	30.25		20.03	10.22	-0.609	1.5252	1.50925
	20.08	20.12	20.1		-0.101	1.07252	1.06352			31.15	31.01	31.08		20.1	10.98	0.151	0.900626	0.891205
	20.23	20.25	20.24		0.039	0.973329	0.965164			31.14	31.24	31.19		20.24	10.95	0.121	0.91955	0.909931
	20.15	20.11	20.13		-0.071	1.05044	1.04163			30.54	30.64	30.59		20.13	10.46	-0.369	1.29146	1.27795
			20.2125			1.00128	0.992878					30.5433			10.3308		1.50876	1.49297
Aniso + KCl	R1	R2	Average		Diff-Veh Avg	Relative Enrichment	Normalized		Aniso + KCl	R1	R2	Average		Gapdh Averages	Ct(samples)-Ct(Gapdh)	Diff Avg	Relative enrichment	Normalized
	20.45	20.39	20.42		0.219	0.859161	0.851953			36.03	38.09	37.06		20.42	16.64	5.811	0.0178121	0.0176258
	20.69	20.83	20.76		0.559	0.678772	0.673078			38.94	38.61	38.775		20.76	18.015	7.186	0.0068675	0.00679566
	20.54	20.41	20.475		0.274	0.827023	0.820085			36.02	36.43	36.225		20.475	15.75	4.921	0.0330089	0.0326636
	20.17	20.29	20.23		0.029	0.980099	0.971877			31.95	32.16	32.055		20.23	11.825	0.996	0.501388	0.496143
	20.21	20.29	20.25		0.049	0.966606	0.958497			32.44	32.47	32.455		20.25	12.205	1.376	0.385286	0.381255
	20.28	19.91	20.095		-0.106	1.07624	1.06721			33.49	33.23	33.36		20.095	13.265	2.436	0.184795	0.182862
			20.3717			0.897984	0.89045					34.9883			14.6167		0.188193	0.186224
Plate 2
	1	2	3	4	5	6	7	8	9	10	11	12
A	35.45	35.83	26.73	26.64	27.55	27.59	N/A	N/A	N/A	N/A	N/A	N/A	FosB
B	33.52	33.34	26.35	26.4	27.83	28.03	N/A	N/A	N/A	N/A	N/A	N/A
C	33.66	33.78	26.16	26.35	28.29	28.31	N/A	N/A	N/A	N/A	N/A	N/A
D	33.6	33.54	26.57	26.49	36.93	36.74	N/A	N/A	N/A	N/A	N/A	N/A
E	33.53	33.44	27.61	27.68	29.06	29.04	N/A	N/A	N/A	N/A	N/A	N/A
F	34.06	33.1	27.3	27.39	23.77	23.89	N/A	N/A	N/A	N/A	N/A	N/A
G	27.19	27.13	27.33	27.26	23.86	24.07	N/A	N/A	N/A	N/A	N/A	N/A
H	27.44	27.21	28.18	27.85	25.02	24.94	N/A	N/A	N/A	N/A	N/A	N/A
Fosb
DMSO + Veh	R1	R2	Average		Gapdh Averages	Ct(samples)-Ct(Gapdh)	Diff Avg	Relative enrichment	Normalized
	33.52	33.34	33.43		20.19	13.24	-0.116	1.08373	1.07308
	33.66	33.78	33.72		20.07	13.65	0.294	0.815637	0.807622
	33.6	33.54	33.57		20.36	13.21	-0.146	1.1065	1.09562
	33.53	33.44	33.485		19.935	13.55	0.194	0.874179	0.865587
	34.06	33.1	33.58		20.45	13.13	-0.226	1.16959	1.15809
			33.557			13.356		1.00993	1
Aniso + Veh	R1	R2	Average		Gapdh Averages	Ct(samples)-Ct(Gapdh)	Diff Avg	Relative enrichment	Normalized
	27.19	27.13	27.16		20.145	7.015	-6.341	81.0646	80.2679
	27.44	27.21	27.325		20.38	6.945	-6.411	85.0949	84.2586
	26.73	26.64	26.685		20.22	6.465	-6.891	118.686	117.519
	26.35	26.4	26.375		20.045	6.33	-7.026	130.328	129.047
	26.16	26.35	26.255		20.25	6.005	-7.351	163.257	161.652
	26.57	26.49	26.53		20.045	6.485	-6.871	117.052	115.901
			26.7217			6.54083		115.914	114.774
DMSO + KCl	R1	R2	Average		Gapdh Averages	Ct(samples)-Ct(Gapdh)	Diff Avg	Relative enrichment	Normalized
	27.61	27.68	27.645		20.645	7	-6.356	81.9118	81.1068
	27.3	27.39	27.345		20.13	7.215	-6.141	70.5708	69.8773
	27.33	27.26	27.295		20.03	7.265	-6.091	68.1669	67.497
	28.18	27.85	28.015		20.1	7.915	-5.441	43.4414	43.0145
	27.55	27.59	27.57		20.24	7.33	-6.026	65.1639	64.5234
	27.83	28.03	27.93		20.13	7.8	-5.556	47.046	46.5836
			27.6333			7.42083		62.7168	62.1004
Aniso + KCl	R1	R2	Average		Gapdh Averages	Ct(samples)-Ct(Gapdh)	Diff Avg	Relative enrichment	Normalized
	28.29	28.31	28.3		20.42	7.88	-5.476	44.5082	44.0708
	36.93	36.74	36.835		20.76	16.075	2.719	0.15188	0.150387
	29.06	29.04	29.05		20.475	8.575	-4.781	27.4931	27.2229
	23.77	23.89	23.83		20.23	3.6	-9.756	864.667	856.169
	23.86	24.07	23.965		20.25	3.715	-9.641	798.418	790.571
	25.02	24.94	24.98		20.095	4.885	-8.471	354.834	351.347
			27.8267			7.455		348.345	344.922
