# Supplementary material for: Temporally specific gene expression and chromatin remodeling programs regulate a conserved Pdyn enhancer
Source: eLife. 2023 Nov 8;12:RP89993. doi: 10.7554/eLife.89993 (PMC10631760; doi:10.7554/eLife.89993)
Supplement: Figure 6—source data 1. [file elife-89993-fig6-data1.xlsx]

## Sheet: Experiment 1
Figure 6C RT-qPCR data - Experiment 1
Raw Ct values
Plate 1	1	2	3	4	5	6	7	8	9	10	11	12									Plate 2	1	2	3	4	5	6	7	8	9	10	11	12
A	20	20.05	19.37	19.58	19.81	19.74	30.39	30.36	31.17	31.2	30.62	30.88	Gapdh								A	32.25	32.05	31.63	31.84	26.4	26.47	N/A	N/A	N/A	N/A	N/A	N/A	FosB
B	19.73	19.7	20.01	19.84	20.06	20.07	30.24	30	28.88	28.17	30.74	30.69	Pdyn								B	32.59	31.9	26.31	26.61	26.73	26.75	N/A	N/A	N/A	N/A	N/A	N/A
C	20.27	19.76	20.17	20.12	N/A	N/A	30.64	30.4	29.19	29.01	N/A	N/A									C	32.14	31.59	26.48	26.86	N/A	N/A	N/A	N/A	N/A	N/A	N/A	N/A
D	19.97	19.88	19.43	19.99	N/A	N/A	30.57	30.35	29.21	29.09	N/A	N/A									D	33.86	34.22	26.38	26.58	N/A	N/A	N/A	N/A	N/A	N/A	N/A	N/A
E	19.64	19.7	20.1	19.6	N/A	N/A	30.75	30.77	28.93	29.04	N/A	N/A									E	33.41	33.26	29.48	29.98	N/A	N/A	N/A	N/A	N/A	N/A	N/A	N/A
F	19.58	19.53	19.66	19.78	N/A	N/A	30.62	30.42	29	29.09	N/A	N/A									F	34.01	33.85	29.51	29.67	N/A	N/A	N/A	N/A	N/A	N/A	N/A	N/A
G	20.01	20.04	19.7	19.62	N/A	N/A	31.13	30.83	29.3	29.31	N/A	N/A									G	32.33	32.25	29.7	29.94	N/A	N/A	N/A	N/A	N/A	N/A	N/A	N/A
H	20.04	20.04	19.71	19.4	N/A	N/A	31.39	31.37	30.75	30.22	N/A	N/A									H	32.31	32.21	26.1	26.24	N/A	N/A	N/A	N/A	N/A	N/A	N/A	N/A
Normalization
Gapdh mRNA									Pdyn mRNA												Fosb mRNA
LacZ - Veh	R1	R2	Average		Diff-Veh Avg	Relative Enrichment	Normalized		LacZ - Veh	R1	R2	Average		Gapdh Averages	Ct(samples)-Ct(Gapdh)	Diff Avg	Relative enrichment	Normalized			LacZ - Veh	R1	R2	Average	Average		Gapdh Averages	Ct(samples)-Ct(Gapdh)	Diff Avg	Relative enrichment	Normalized
	20	20.05	20.025		0.106667	0.928731	0.924026			30.39	30.36	30.375		20.025	10.35	-0.105	1.07549	1.04868				32.25	32.05	32.15	32.1		20.025	12.075	-0.139375	1.10143	1.06203
	19.73	19.7	19.715		-0.203333	1.15136	1.14552			30.24	30	30.12		19.715	10.405	-0.05	1.03526	1.00946				32.59	31.9	32.245	32.0725		19.715	12.3575	0.143125	0.905556	0.873167
	20.27	19.76	20.015		0.0966667	0.935191	0.930453			30.64	30.4	30.52		20.015	10.505	0.05	0.965936	0.941858				32.14	31.59	31.865	32.0862		20.015	12.0712	-0.143125	1.10429	1.0648
			19.9183			1.00509	1					30.32			10.455		1.02557	1						32.0867	32.0794			12.2144		1.03709	1
FosB - Veh	R1	R2	Average		Diff-Veh Avg	Relative Enrichment	Normalized		FosB - Veh	R1	R2	Average		Gapdh Averages	Ct(samples)-Ct(Gapdh)	Diff Avg	Relative enrichment	Normalized			FosB - Veh	R1	R2	Average	Average		Gapdh Averages	Ct(samples)-Ct(Gapdh)	Diff Avg	Relative enrichment	Normalized
	19.97	19.88	19.925		0.00666667	0.99539	0.990346			30.57	30.35	30.46		19.925	10.535	0.08	0.946058	0.922474				33.86	34.22	34.04	34.13		19.925	14.205	1.99062	0.25163	0.24263
	19.64	19.7	19.67		-0.248333	1.18783	1.18182			30.75	30.77	30.76		19.67	11.09	0.635	0.643941	0.627889				33.41	33.26	33.335	33.2975		19.67	13.6275	1.41312	0.375497	0.362067
	19.58	19.53	19.555		-0.363333	1.28639	1.27988			30.62	30.42	30.52		19.555	10.965	0.51	0.702222	0.684717				34.01	33.85	33.93	33.7137		19.555	14.1587	1.94437	0.259827	0.250534
			19.7167			1.15654	1.15068					30.64			11.0275		0.673082	0.745027						33.7683	33.5056			13.8931		0.295652	0.285077
Pdyn - Veh	R1	R2	Average		Diff-Veh Avg	Relative Enrichment	Normalized		Pdyn - Veh	R1	R2	Average		Gapdh Averages	Ct(samples)-Ct(Gapdh)	Diff Avg	Relative enrichment	Normalized			Pdyn - Veh	R1	R2	Average	Average		Gapdh Averages	Ct(samples)-Ct(Gapdh)	Diff Avg	Relative enrichment	Normalized
	20.01	20.04	20.025		0.106667	0.928731	0.924026			31.13	30.83	30.98		20.025	10.955	0.5	0.707107	0.68948				32.33	32.25	32.29	32.27		20.025	12.245	0.030625	0.978996	0.943981
	20.04	20.04	20.04		0.121667	0.919125	0.914468			31.39	31.37	31.38		20.04	11.34	0.885	0.541488	0.527989				32.31	32.21	32.26	32.235		20.04	12.195	-0.019375	1.01352	0.977271
	19.37	19.58	19.475		-0.443333	1.35974	1.35285			31.17	31.2	31.185		19.475	11.71	1.255	0.418994	0.408549				31.63	31.84	31.735	32.2525		19.475	12.7775	0.563125	0.676834	0.652627
			19.8467			1.0692	1.06378					31.2825			11.525		0.480241	0.542006						32.095	32.2437			12.4862		0.889784	0.85796
LacZ - KCl	R1	R2	Average		Diff-Veh Avg	Relative Enrichment	Normalized		LacZ - KCl	R1	R2	Average		Gapdh Averages	Ct(samples)-Ct(Gapdh)	Diff Avg	Relative enrichment	Normalized			LacZ - KCl	R1	R2	Average	Average		Gapdh Averages	Ct(samples)-Ct(Gapdh)	Diff Avg	Relative enrichment	Normalized
	20.01	19.84	19.925		0.00666667	0.99539	0.990346			28.88	28.17	28.525		19.925	8.6	-1.855	3.61752	3.52734				26.31	26.61	26.46	26.535		19.925	6.61	-5.60438	48.6502	46.9102
	20.17	20.12	20.145		0.226667	0.854607	0.850277			29.19	29.01	29.1		20.145	8.955	-1.5	2.82843	2.75792				26.48	26.86	26.67	26.765		20.145	6.62	-5.59438	48.3142	46.5862
	19.43	19.99	19.71		-0.208333	1.15535	1.1495			29.21	29.09	29.15		19.71	9.44	-1.015	2.0209	1.97053				26.38	26.58	26.48	26.65		19.71	6.94	-5.27438	38.703	37.3188
			19.9267			1.00178	0.996707					29.125			9.1975		2.42467	2.75193						26.5367	26.7075			6.78		45.2225	43.6051
FosB - KCl	R1	R2	Average		Diff-Veh Avg	Relative Enrichment	Normalized		FosB - KCl	R1	R2	Average		Gapdh Averages	Ct(samples)-Ct(Gapdh)	Diff Avg	Relative enrichment	Normalized			FosB - KCl	R1	R2	Average	Average		Gapdh Averages	Ct(samples)-Ct(Gapdh)	Diff Avg	Relative enrichment	Normalized
	20.1	19.6	19.85		-0.0683333	1.0485	1.04319			28.93	29.04	28.985		19.85	9.135	-1.32	2.49666	2.43442				29.48	29.98	29.73	29.855		19.85	10.005	-2.20938	4.62475	4.45934
	19.66	19.78	19.72		-0.198333	1.14737	1.14156			29	29.09	29.045		19.72	9.325	-1.13	2.18859	2.13403				29.51	29.67	29.59	29.63		19.72	9.91	-2.30437	4.93953	4.76287
	19.7	19.62	19.66		-0.258333	1.1961	1.19004			29.3	29.31	29.305		19.66	9.645	-0.81	1.75321	1.70951				29.7	29.94	29.82	29.7425		19.66	10.0825	-2.13188	4.38287	4.22611
			19.7433			1.13066	1.12493					29.175			9.485		1.9709	2.09265						29.7133	29.6863			9.99625		4.64905	4.48277
Pdyn - KCl	R1	R2	Average		Diff-Veh Avg	Relative Enrichment	Normalized		Pdyn - KCl	R1	R2	Average		Gapdh Averages	Ct(samples)-Ct(Gapdh)	Diff Avg	Relative enrichment	Normalized			Pdyn - KCl	R1	R2	Average	Average		Gapdh Averages	Ct(samples)-Ct(Gapdh)	Diff Avg	Relative enrichment	Normalized
	19.71	19.4	19.555		-0.363333	1.28639	1.27988			30.75	30.22	30.485		19.555	10.93	0.475	0.719467	0.701532				26.1	26.24	26.17	26.205		19.555	6.65	-5.56438	47.3199	45.6275
	19.81	19.74	19.775		-0.143333	1.10445	1.09886			30.62	30.88	30.75		19.775	10.975	0.52	0.697372	0.679988				26.4	26.47	26.435	26.4525		19.775	6.6775	-5.53688	46.4264	44.766
	20.06	20.07	20.065		0.146667	0.903335	0.898758			30.74	30.69	30.715		20.065	10.65	0.195	0.873573	0.851797				26.73	26.75	26.74	26.3287		20.065	6.26375	-5.95063	61.8467	59.6347
			19.7983			1.09806	1.0925					30.7325			10.8125		0.785472	0.744439						26.4483	26.3906			6.47063		51.8644	50.0094

## Sheet: Experiment 2
Figure 6C RT-qPCR data - Experiment 2
Raw Ct values
Plate 1	1	2	3	4	5	6	7	8	9	10	11	12									Plate 2	1	2	3	4	5	6	7	8	9	10	11	12
A	19.78	19.47	19.51	19.85	19.59	19.5	32.91	33.22	32.27	32.12	34.86	34.45	Gapdh								A	33.47	33.45	32.94	32.94	30.24	30.34	N/A	N/A	N/A	N/A	N/A	N/A	FosB
B	19.47	19.27	19.6	20.03	19.67	19.5	32.13	32.55	31.38	31.47	33.57	33.36	Pdyn								B	32.48	32.63	28.48	28.55	29.76	29.57	N/A	N/A	N/A	N/A	N/A	N/A
C	19.77	19.53	19.66	20.01	N/A	N/A	34.62	34.8	31.94	32.03	N/A	N/A									C	35.33	34.82	29.37	29.24	N/A	N/A	N/A	N/A	N/A	N/A	N/A	N/A
D	19.9	19.51	20.17	20.4	N/A	N/A	34.36	33.84	33.27	33.12	N/A	N/A									D	36.21	35.3	31.83	31.84	N/A	N/A	N/A	N/A	N/A	N/A	N/A	N/A
E	19.64	19.38	20.04	20.13	N/A	N/A	33.93	33.73	33.11	32.87	N/A	N/A									E	35.31	34.9	32.81	33.12	N/A	N/A	N/A	N/A	N/A	N/A	N/A	N/A
F	19.97	19.72	19.41	19.89	N/A	N/A	35.59	34.86	31.91	32.06	N/A	N/A									F	37.43	37.56	33.34	33.56	N/A	N/A	N/A	N/A	N/A	N/A	N/A	N/A
G	19.53	19.36	19.77	19.7	N/A	N/A	34.59	34.18	31.29	31.5	N/A	N/A									G	34.35	34.27	32.74	32.71	N/A	N/A	N/A	N/A	N/A	N/A	N/A	N/A
H	20.31	20.09	20.06	19.91	N/A	N/A	35.05	35.36	32.72	32.46	N/A	N/A									H	34.48	34.99	29.96	30.14	N/A	N/A	N/A	N/A	N/A	N/A	N/A	N/A
Normalization
Gapdh mRNA									Pdyn mRNA												Fosb mRNA
LacZ - Veh	R1	R2	Average		Diff-Veh Avg	Relative Enrichment	Normalized		LacZ - Veh	R1	R2	Average		Gapdh Averages	Ct(samples)-Ct(Gapdh)	Diff Avg	Relative enrichment	Normalized			LacZ - Veh	R1	R2	Average		Gapdh Averages	Ct(samples)-Ct(Gapdh)	Diff Avg	Relative enrichment	Normalized
	19.78	19.47	19.625		0.0766667	0.948246	0.944538			32.91	33.22	33.065		19.625	13.44	-0.575	1.48968	1.16929				33.47	33.45	33.46		0	33.46	-0.355	1.27899	0.9095
	19.47	19.27	19.37		-0.178333	1.13158	1.12715			32.13	32.55	32.34		19.37	12.97	-1.045	2.06337	1.61959				32.48	32.63	32.555		0	32.555	-1.26	2.39496	1.70308
	19.77	19.53	19.65		0.101667	0.931956	0.928311			34.62	34.8	34.71		19.65	15.06	1.045	0.484645	0.38041				35.33	34.82	35.075		0	35.075	1.26	0.417544	0.29692
			19.5483			1.00393	1					33.525			14.015		1.27401	1.05643						33.6967			33.815		1.40625	0.969833
FosB - Veh	R1	R2	Average		Diff-Veh Avg	Relative Enrichment	Normalized		FosB - Veh	R1	R2	Average		Gapdh Averages	Ct(samples)-Ct(Gapdh)	Diff Avg	Relative enrichment	Normalized			FosB - Veh	R1	R2	Average		Gapdh Averages	Ct(samples)-Ct(Gapdh)	Diff Avg	Relative enrichment	Normalized
	19.9	19.51	19.705		0.156667	0.897095	0.893587			34.36	33.84	34.1		19.705	14.395	0.38	0.768438	0.603167				36.21	35.3	35.755		0	35.755	1.94	0.260616	0.185327				3
	19.64	19.38	19.51		-0.0383333	1.02693	1.02291			33.93	33.73	33.83		19.51	14.32	0.305	0.809442	0.635352				35.31	34.9	35.105		0	35.105	1.29	0.408951	0.290809
	19.97	19.72	19.845		0.296667	0.814131	0.810948			35.59	34.86	35.225		19.845	15.38	1.365	0.388234	0.304735				37.43	37.56	37.495		0	37.495	3.68	0.0780207	0.0554813
			19.6867			0.912718	0.909149					34.5275			14.85		0.598838	0.514418						36.1183			36.3		0.243486	0.177206
Pdyn - Veh	R1	R2	Average		Diff-Veh Avg	Relative Enrichment	Normalized		Pdyn - Veh	R1	R2	Average		Gapdh Averages	Ct(samples)-Ct(Gapdh)	Diff Avg	Relative enrichment	Normalized			Pdyn - Veh	R1	R2	Average		Gapdh Averages	Ct(samples)-Ct(Gapdh)	Diff Avg	Relative enrichment	Normalized
	19.53	19.36	19.445		-0.103333	1.07425	1.07005			34.59	34.18	34.385		19.445	14.94	0.925	0.526681	0.413405				34.35	34.27	34.31		0	34.31	0.495	0.709562	0.504577
	20.31	20.09	20.2		0.651667	0.636545	0.634055			35.05	35.36	35.205		20.2	15.005	0.99	0.503478	0.395193				34.48	34.99	34.735		0	34.735	0.92	0.528509	0.375828
	19.51	19.85	19.68		0.131667	0.912776	0.909207			32.27	32.12	32.195		19.68	12.515	-1.5	2.82843	2.22011				32.94	32.94	32.94		0	32.94	-0.875	1.83401	1.30418
			19.775			0.874525	0.871105					33.7			13.76		1.66595	1.00957						33.995			33.8375		1.18126	0.728196
LacZ - KCl	R1	R2	Average		Diff-Veh Avg	Relative Enrichment	Normalized		LacZ - KCl	R1	R2	Average		Gapdh Averages	Ct(samples)-Ct(Gapdh)	Diff Avg	Relative enrichment	Normalized			LacZ - KCl	R1	R2	Average		Gapdh Averages	Ct(samples)-Ct(Gapdh)	Diff Avg	Relative enrichment	Normalized
	19.6	20.03	19.815		0.266667	0.831238	0.827987			31.38	31.47	31.425		19.815	11.61	-2.405	5.29636	4.15725				28.48	28.55	28.515		0	28.515	-5.3	39.3966	28.0154
	19.66	20.01	19.835		0.286667	0.819794	0.816588			31.94	32.03	31.985		19.835	12.15	-1.865	3.64268	2.85923				29.37	29.24	29.305		0	29.305	-4.51	22.7848	16.2025
	20.17	20.4	20.285		0.736667	0.600124	0.597778			33.27	33.12	33.195		20.285	12.91	-1.105	2.15099	1.68837				31.83	31.84	31.835		0	31.835	-1.98	3.94493	2.80528
			19.9783			0.750385	0.747451					32.59			12.53		2.89683	2.90162						29.885			30.57		13.3649	15.6744
FosB - KCl	R1	R2	Average		Diff-Veh Avg	Relative Enrichment	Normalized		FosB - KCl	R1	R2	Average		Gapdh Averages	Ct(samples)-Ct(Gapdh)	Diff Avg	Relative enrichment	Normalized			FosB - KCl	R1	R2	Average		Gapdh Averages	Ct(samples)-Ct(Gapdh)	Diff Avg	Relative enrichment	Normalized
	20.04	20.13	20.085		0.536667	0.689362	0.686666			33.11	32.87	32.99		20.085	12.905	-1.11	2.15846	1.69423				32.81	33.12	32.965		0	32.965	-0.85	1.8025	1.28178
	19.41	19.89	19.65		0.101667	0.931956	0.928311			31.91	32.06	31.985		19.65	12.335	-1.68	3.20428	2.51512				33.34	33.56	33.45		0	33.45	-0.365	1.28788	0.915826
	19.77	19.7	19.735		0.186667	0.878633	0.875198			31.29	31.5	31.395		19.735	11.66	-2.355	5.11594	4.01564				32.74	32.71	32.725		0	32.725	-1.09	2.12874	1.51377
			19.8233			0.833317	0.830058					31.69			11.9975		4.16011	2.74166						33.0467			33.0875		1.70831	1.23712
Pdyn - KCl	R1	R2	Average		Diff-Veh Avg	Relative Enrichment	Normalized		Pdyn - KCl	R1	R2	Average		Gapdh Averages	Ct(samples)-Ct(Gapdh)	Diff Avg	Relative enrichment	Normalized			Pdyn - KCl	R1	R2	Average		Gapdh Averages	Ct(samples)-Ct(Gapdh)	Diff Avg	Relative enrichment	Normalized
	20.06	19.91	19.985		0.436667	0.73884	0.73595			32.72	32.46	32.59		19.985	12.605	-1.41	2.65737	2.08584				29.96	30.14	30.05		0	30.05	-3.765	13.595	9.66752
	19.59	19.5	19.545		-0.00333333	1.00231	0.998394			34.86	34.45	34.655		19.545	15.11	1.095	0.468136	0.367452				30.24	30.34	30.29		0	30.29	-3.525	11.5115	8.18593
	19.67	19.5	19.585		0.0366667	0.974905	0.971092			33.57	33.36	33.465		19.585	13.88	-0.135	1.09809	0.861921				29.76	29.57	29.665		0	29.665	-4.15	17.7531	12.6244
			19.705			0.905353	0.901812					34.06			14.495		0.783114	1.10507						30.0017			29.9775		14.6323	10.1593
