# Supplementary material for: Temporally specific gene expression and chromatin remodeling programs regulate a conserved Pdyn enhancer
Source: eLife. 2023 Nov 8;12:RP89993. doi: 10.7554/eLife.89993 (PMC10631760; doi:10.7554/eLife.89993)
Supplement: Figure 6—source data 2. [file elife-89993-fig6-data2.xlsx]

## Sheet: Experiment 1
Figure 6D RT-qPCR data - Experiment 1
Raw Ct values
Plate 1	1	2	3	4	5	6	7	8	9	10	11	12								Plate 2	1	2	3	4	5	6	7	8	9	10	11	12	Primers:		Plate 3	1	2	3	4	5	6	7	8	9	10	11	12	Primers:
A	19.26	19.38	19.05	19.08	29.88	29.84	33.57	33.27	25.39	25.17	N/A	N/A		Primers:						A	1	1											Sirpa		A	1	1											Stk35
B	19.08	19.13	19.03	18.76	29.58	29.7	30.58	30.49	25.35	25.32	N/A	N/A		Gapdh						B	2	2													B	2	2
C	19.18	19.11	19.02	18.73	30.51	30.62	32.47	32.08	25.87	25.61	N/A	N/A		FosB						C	3	3													C	3	3
D	19.19	18.92	18.92	18.71	30.21	30.29	31.05	30.91	25.64	25.56	N/A	N/A		Pdyn						D	4	4													D	4	4
E	19.01	18.91	36.61	34.27	33.2	33.3	30.1	30.25	N/A	N/A	N/A	N/A								E	9	9													E	9	9
F	19.05	18.78	33.75	33.73	33.48	33.33	30.87	30.74	N/A	N/A	N/A	N/A								F	10	10													F	10	10
G	19.05	18.85	33.9	33.73	33.62	33.8	31.21	31.26	N/A	N/A	N/A	N/A								G	11	11													G	11	11
H	19.15	19.03	33.76	34.08	33.51	33.89	30.84	30.67	N/A	N/A	N/A	N/A								H	12	12													H	12	12
																					Experiment 1															Experiment 1
Normalization
Gapdh mRNA									Fosb mRNA											Plate 2	1	2	3	4	5	6	7	8	9	10	11	12			Plate 3	1	2	3	4	5	6	7	8	9	10	11	12
lacZ sgRNAs	R1	R2	Average		Diff-Veh Avg	Relative Enrichment	Normalized		lacZ sgRNAs	R1	R2	Average		Gapdh Averages	Ct(samples)-Ct(Gapdh)	Diff Avg	Relative enrichment	Normalized		A	28.28	28.29	N/A	N/A	N/A	N/A	N/A	N/A	N/A	N/A	N/A	N/A			A	29.73	29.92	N/A	N/A	N/A	N/A	N/A	N/A	N/A	N/A	N/A	N/A
	19.26	19.38	19.32		0.16375	0.892702	0.89061			36.61	34.27	35.44		19.32	16.12	1.0475	0.483806	0.448535		B	27.25	27.18	N/A	N/A	N/A	N/A	N/A	N/A	N/A	N/A	N/A	N/A			B	29.05	28.75	N/A	N/A	N/A	N/A	N/A	N/A	N/A	N/A	N/A	N/A
	19.08	19.13	19.105		-0.05125	1.03616	1.03373			33.75	33.73	33.74		19.105	14.635	-0.4375	1.35426	1.25553		C	27.85	27.53	N/A	N/A	N/A	N/A	N/A	N/A	N/A	N/A	N/A	N/A			C	29.86	29.21	N/A	N/A	N/A	N/A	N/A	N/A	N/A	N/A	N/A	N/A
	19.18	19.11	19.145		-0.01125	1.00783	1.00547			33.9	33.73	33.815		19.145	14.67	-0.4025	1.3218	1.22543		D	27.19	27.02	N/A	N/A	N/A	N/A	N/A	N/A	N/A	N/A	N/A	N/A			D	29.13	29.22	N/A	N/A	N/A	N/A	N/A	N/A	N/A	N/A	N/A	N/A
	19.19	18.92	19.055		-0.10125	1.0727	1.07019			33.76	34.08	33.92		19.055	14.865	-0.2075	1.15469	1.07051		E	27.2	26.96	N/A	N/A	N/A	N/A	N/A	N/A	N/A	N/A	N/A	N/A			E	29.01	29.01	N/A	N/A	N/A	N/A	N/A	N/A	N/A	N/A	N/A	N/A
			19.1562			1.00235	1					34.2287			15.0725		1.07864	1		F	27.14	26.85	N/A	N/A	N/A	N/A	N/A	N/A	N/A	N/A	N/A	N/A			F	29.1	29.12	N/A	N/A	N/A	N/A	N/A	N/A	N/A	N/A	N/A	N/A
																				G	27.48	27.04	N/A	N/A	N/A	N/A	N/A	N/A	N/A	N/A	N/A	N/A			G	29.41	29.43	N/A	N/A	N/A	N/A	N/A	N/A	N/A	N/A	N/A	N/A
Fosb sgRNAs	R1	R2	Average		Diff-Veh Avg	Relative Enrichment	Normalized		Fosb sgRNAs	R1	R2	Average		Gapdh Averages	Ct(samples)-Ct(Gapdh)	Diff Avg	Relative enrichment	Normalized		H	27.08	26.75	N/A	N/A	N/A	N/A	N/A	N/A	N/A	N/A	N/A	N/A			H	29.38	29.15	N/A	N/A	N/A	N/A	N/A	N/A	N/A	N/A	N/A	N/A
	19.01	18.91	18.96		-0.19625	1.14572	1.14303			29.88	29.84	29.86		18.96	10.9	-4.1725	18.0322	16.7176
	19.05	18.78	18.915		-0.24125	1.18202	1.17925			29.58	29.7	29.64		18.915	10.725	-4.3475	20.3577	18.8735		Sirpa mRNA															Stk35 mRNA
	19.05	18.85	18.95		-0.20625	1.15369	1.15098			30.51	30.62	30.565		18.95	11.615	-3.4575	10.9853	10.1844		lacZ sgRNAs	R1	R2	Average		Gapdh Averages	Ct(samples)-Ct(Gapdh)	Diff Avg	Relative enrichment	Normalized						lacZ sgRNAs	R1	R2	Average		Gapdh Averages	Ct(samples)-Ct(Gapdh)	Diff Avg	Relative enrichment	Normalized
	19.15	19.03	19.09		-0.06625	1.04699	1.04454			30.21	30.29	30.25		19.09	11.16	-3.9125	15.0584	13.9606			28.28	28.29	28.285		19.32	8.965	0.5475	0.684205	0.663102							29.73	29.92	29.825		19.32	10.505	0.3025	0.810846	0.796077
			18.9788			1.1321	1.12945					30.0787			11.1		16.1084	14.934			27.25	27.18	27.215		19.105	8.11	-0.3075	1.23756	1.19939							29.05	28.75	28.9		19.105	9.795	-0.4075	1.32639	1.30223
																					27.85	27.53	27.69		19.145	8.545	0.1275	0.915416	0.887182							29.86	29.21	29.535		19.145	10.39	0.1875	0.878126	0.862132
Pdyn DAR sgRNAs	R1	R2	Average		Diff-Veh Avg	Relative Enrichment	Normalized		Pdyn DAR sgRNAs	R1	R2	Average		Gapdh Averages	Ct(samples)-Ct(Gapdh)	Diff Avg	Relative enrichment	Normalized			27.19	27.02	27.105		19.055	8.05	-0.3675	1.29012	1.25032							29.13	29.22	29.175		19.055	10.12	-0.0825	1.05885	1.03957
	19.05	19.08	19.065		-0.09125	1.06529	1.0628			33.2	33.3	33.25		19.065	14.185	-0.8875	1.84997	1.7151					27.5738			8.4175		1.03182	1									29.3588			10.2025		1.01855	1
	19.03	18.76	18.895		-0.26125	1.19852	1.19571			33.48	33.33	33.405		18.895	14.51	-0.5625	1.47683	1.36916
	19.02	18.73	18.875		-0.28125	1.21525	1.2124			33.62	33.8	33.71		18.875	14.835	-0.2375	1.17895	1.093		Pdyn DAR sgRNAs	R1	R2	Average		Gapdh Averages	Ct(samples)-Ct(Gapdh)	Diff Avg	Relative enrichment	Normalized						Pdyn DAR sgRNAs	R1	R2	Average		Gapdh Averages	Ct(samples)-Ct(Gapdh)	Diff Avg	Relative enrichment	Normalized
	18.92	18.71	18.815		-0.34125	1.26685	1.26389			33.51	33.89	33.7		18.815	14.885	-0.1875	1.13879	1.05577			27.2	26.96	27.08		18.96	8.12	-0.2975	1.22901	1.19111							29.01	29.01	29.01		18.96	10.05	-0.1525	1.11149	1.09125
			18.9125			1.18648	1.1837					33.5162			14.6037		1.41113	1.30826			27.14	26.85	26.995		18.915	8.08	-0.3375	1.26357	1.22459							29.1	29.12	29.11		18.915	10.195	-0.0075	1.00521	0.986903
																					27.48	27.04	27.26		18.95	8.31	-0.1075	1.07736	1.04413							29.41	29.43	29.42		18.95	10.47	0.2675	0.830758	0.815626
Pdyn mRNA																					27.08	26.75	26.915		19.09	7.825	-0.5925	1.50786	1.46135							29.38	29.15	29.265		19.09	10.175	-0.0275	1.01924	1.00068
lacZ sgRNAs	R1	R2	Average		Gapdh Averages	Ct(samples)-Ct(Gapdh)	Diff Avg	Relative enrichment	Normalized														27.0625			8.08375		1.26945	1.2303									29.2013			10.2225		0.991677	0.973614
	33.57	33.27	33.42		19.32	14.1	1.45375	0.365071	0.289038
	30.58	30.49	30.535		19.105	11.43	-1.21625	2.32342	1.83952
	32.47	32.08	32.275		19.145	13.13	0.48375	0.715116	0.56618
	31.05	30.91	30.98		19.055	11.925	-0.72125	1.64861	1.30526
			31.8025			12.6462		1.26305	1
Fosb sgRNAs	R1	R2	Average		Gapdh Averages	Ct(samples)-Ct(Gapdh)	Diff Avg	Relative enrichment	Normalized
	30.1	30.25	30.175		18.96	11.215	-1.43125	2.6968	2.13514
	30.87	30.74	30.805		18.915	11.89	-0.75625	1.68909	1.33731
	31.21	31.26	31.235		18.95	12.285	-0.36125	1.28454	1.01701
	30.84	30.67	30.755		19.09	11.665	-0.98125	1.97418	1.56302
			30.7425			11.7638		1.91115	1.51312
Pdyn DAR sgRNAs	R1	R2	Average		Gapdh Averages	Ct(samples)-Ct(Gapdh)	Diff Avg	Relative enrichment	Normalized
	25.39	25.17	25.28		19.065	6.215	-6.43125	86.2977	68.3246
	25.35	25.32	25.335		18.895	6.44	-6.20625	73.8359	58.4582
	25.87	25.61	25.74		18.875	6.865	-5.78125	54.9958	43.5419
	25.64	25.56	25.6		18.815	6.785	-5.86125	58.1316	46.0246
			25.4888			6.57625		68.3152	54.0873

## Sheet: Experiment 2
Figure 6D RT-qPCR data - Experiment 2
Raw Ct values
Plate 1	1	2	3	4	5	6	7	8	9	10	11	12	Primers:							Plate 2	1	2	3	4	5	6	7	8	9	10	11	12	Primers:
A	19.2	19.07	20.47	20.37	19.17	19.04	30.96	31.05	33.09	33.41	30.3	30.46	Gapdh							A	35.59	35.45	34.19	34.49	36.65	36.44	N/A	N/A	N/A	N/A	N/A	N/A	FosB
B	19.45	19.49	20.32	19.96	20.09	20.17	31.19	31.39	33.27	33.29	33.32	33.11	Pdyn							B	36.15	36.37	35.29	35.41	37.53	37.2	N/A	N/A	N/A	N/A	N/A	N/A
C	19.24	19.11	19.29	19.21	19.33	19.32	31.59	31.44	30.74	30.47	30.67	30.62								C	33.21	32.78	36.05	35.33	36.08	36.28	N/A	N/A	N/A	N/A	N/A	N/A
D	19.3	19.28	20.25	20.25	N/A	N/A	31	31.16	32.47	32.3	N/A	N/A								D	33.46	33.39	34.97	35.53	N/A	N/A	N/A	N/A	N/A	N/A	N/A	N/A
E	19.15	19.09	19.16	19.07	N/A	N/A	26.07	26.4	30.47	30.36	N/A	N/A								E	35.75	34.99	36.39	36.15	N/A	N/A	N/A	N/A	N/A	N/A	N/A	N/A
F	19.15	19.02	20.13	20.1	N/A	N/A	25.75	25.65	32.2	32.25	N/A	N/A								F	35.87	35.39	33.57	33.81	N/A	N/A	N/A	N/A	N/A	N/A	N/A	N/A
G	19.22	19.16	19.25	19.38	N/A	N/A	26.26	26.38	29.55	29.58	N/A	N/A								G	35.49	36.05	35.42	35.34	N/A	N/A	N/A	N/A	N/A	N/A	N/A	N/A
H	19.27	19.32	19.43	19.01	N/A	N/A	26.69	26.87	29.94	29.97	N/A	N/A								H	36.05	35.98	35.64	36.23	N/A	N/A	N/A	N/A	N/A	N/A	N/A	N/A
Normalized
Gapdh mRNA									Pdyn mRNA											Fosb mRNA
lacZ sgRNAs	R1	R2	Average		Diff-Veh Avg	Relative Enrichment	Normalized		lacZ sgRNAs	R1	R2	Average		Gapdh Averages	Ct(samples)-Ct(Gapdh)	Diff Avg	Relative enrichment	Normalized		lacZ sgRNAs	R1	R2	Average		Gapdh Averages	Ct(samples)-Ct(Gapdh)	Diff Avg	Relative enrichment	Normalized
	19.2	19.07	19.135		-0.1675	1.12311	1.11558			30.96	31.05	31.005		19.135	11.87	0.025	0.982821	0.982673			35.59	35.45	35.52		19.135	16.385	-0.2025	1.15069	1.13945
	19.45	19.49	19.47		0.1675	0.890384	0.884417			31.19	31.39	31.29		19.47	11.82	-0.025	1.01748	1.01733			36.15	36.37	36.26		19.47	16.79	0.2025	0.869043	0.860552
			19.3025			1.00675	1					31.1475			11.845		1.00015	1					35.89			16.5875		1.00987	1
Fosb sgRNAs	R1	R2	Average		Diff-Veh Avg	Relative Enrichment	Normalized		Fosb sgRNAs	R1	R2	Average		Gapdh Averages	Ct(samples)-Ct(Gapdh)	Diff Avg	Relative enrichment	Normalized		Fosb sgRNAs	R1	R2	Average		Gapdh Averages	Ct(samples)-Ct(Gapdh)	Diff Avg	Relative enrichment	Normalized
	19.24	19.11	19.175		-0.1275	1.0924	1.08508			31.59	31.44	31.515		19.175	12.34	0.495	0.709562	0.709455			33.21	32.78	32.995		19.175	13.82	-2.7675	6.80927	6.74274
	19.3	19.28	19.29		-0.0125	1.0087	1.00194			31	31.16	31.08		19.29	11.79	-0.055	1.03886	1.0387			33.46	33.39	33.425		19.29	14.135	-2.4525	5.47364	5.42016
			19.2325			1.05055	1.04351					31.2975			12.065		0.87421	0.874079					33.21			13.9775		6.14145	6.08145
Pdyn DAR sgRNAs	R1	R2	Average		Diff-Veh Avg	Relative Enrichment	Normalized		Pdyn DAR sgRNAs	R1	R2	Average		Gapdh Averages	Ct(samples)-Ct(Gapdh)	Diff Avg	Relative enrichment	Normalized		Pdyn DAR sgRNAs	R1	R2	Average		Gapdh Averages	Ct(samples)-Ct(Gapdh)	Diff Avg	Relative enrichment	Normalized
	19.15	19.09	19.12		-0.1825	1.13485	1.12724			26.07	26.4	26.235		19.12	7.115	-4.73	26.5382	26.5342			35.75	34.99	35.37		19.12	16.25	-0.3375	1.26357	1.25122
	19.15	19.02	19.085		-0.2175	1.16272	1.15492			25.75	25.65	25.7		19.085	6.615	-5.23	37.5307	37.5251			35.87	35.39	35.63		19.085	16.545	-0.0425	1.0299	1.01983
	19.22	19.16	19.19		-0.1125	1.0811	1.07385			26.26	26.38	26.32		19.19	7.13	-4.715	26.2637	26.2598			35.49	36.05	35.77		19.19	16.58	-0.0075	1.00521	0.995391
	19.27	19.32	19.295		-0.0075	1.00521	0.998475			26.69	26.87	26.78		19.295	7.485	-4.36	20.5348	20.5317			36.05	35.98	36.015		19.295	16.72	0.1325	0.912249	0.903336
			19.2425			1.09597	1.08862					31.15			7.3075		27.7169	27.7127					35.6962			16.65		1.05273	1.04245
Plate 3	1	2	3	4	5	6	7	8	9	10	11	12	Primers:	Plate 4	1	2	3	4	5	6	7	8	9	10	11	12	Primers:
A			1	1									Sirpa	A			1	1									Stk35
B			2	2										B			2	2
C			5	5										C			5	5
D			6	6										D			6	6
E			7	7										E			7	7
F			8	8										F			8	8
G														G
H														H
			Experiment 2														Experiment 2
Sirpa mRNA														Stk35 mRNA
	1	2	3	4	5	6	7	8	9	10	11	12			1	2	3	4	5	6	7	8	9	10	11	12
	N/A	N/A	27.19	27.38	N/A	N/A	N/A	N/A	N/A	N/A	N/A	N/A			N/A	N/A	28.99	29.05	N/A	N/A	N/A	N/A	N/A	N/A	N/A	N/A
	N/A	N/A	28.05	27.49	N/A	N/A	N/A	N/A	N/A	N/A	N/A	N/A			N/A	N/A	29.24	29.19	N/A	N/A	N/A	N/A	N/A	N/A	N/A	N/A
	N/A	N/A	27.18	27.06	N/A	N/A	N/A	N/A	N/A	N/A	N/A	N/A			N/A	N/A	29.08	29.01	N/A	N/A	N/A	N/A	N/A	N/A	N/A	N/A
	N/A	N/A	27.33	27.15	N/A	N/A	N/A	N/A	N/A	N/A	N/A	N/A			N/A	N/A	29.13	29	N/A	N/A	N/A	N/A	N/A	N/A	N/A	N/A
	N/A	N/A	27.54	27.47	N/A	N/A	N/A	N/A	N/A	N/A	N/A	N/A			N/A	N/A	29.18	29.28	N/A	N/A	N/A	N/A	N/A	N/A	N/A	N/A
	N/A	N/A	27.7	28.06	N/A	N/A	N/A	N/A	N/A	N/A	N/A	N/A			N/A	N/A	29.29	29.46	N/A	N/A	N/A	N/A	N/A	N/A	N/A	N/A
	N/A	N/A	N/A	N/A	N/A	N/A	N/A	N/A	N/A	N/A	N/A	N/A			N/A	N/A	N/A	N/A	N/A	N/A	N/A	N/A	N/A	N/A	N/A	N/A
	N/A	N/A	N/A	N/A	N/A	N/A	N/A	N/A	N/A	N/A	N/A	N/A			N/A	N/A	N/A	N/A	N/A	N/A	N/A	N/A	N/A	N/A	N/A	N/A
lacZ sgRNAs	R1	R2	Average		Gapdh Averages	Ct(samples)-Ct(Gapdh)	Diff Avg	Relative enrichment	Normalized					lacZ sgRNAs	R1	R2	Average		Gapdh Averages	Ct(samples)-Ct(Gapdh)	Diff Avg	Relative enrichment	Normalized
	27.19	27.38	27.285		19.135	8.15	-0.075	1.05336	1.05194						28.99	29.05	29.02		19.135	9.885	0.07	0.952638	0.951352
	28.05	27.49	27.77		19.47	8.3	0.075	0.949342	0.948061						29.24	29.19	29.215		19.47	9.745	-0.07	1.04972	1.0483
			27.5275			8.225		1.00135	1								29.1175			9.815		1.00118	0.999826
Pdyn DAR sgRNAs	R1	R2	Average		Gapdh Averages	Ct(samples)-Ct(Gapdh)	Diff Avg	Relative enrichment	Normalized					Pdyn DAR sgRNAs	R1	R2	Average		Gapdh Averages	Ct(samples)-Ct(Gapdh)	Diff Avg	Relative enrichment	Normalized
	27.18	27.06	27.12		19.12	8	-0.225	1.16878	1.1672						29.08	29.01	29.045		19.12	9.925	0.11	0.926588	0.925337
	27.33	27.15	27.24		19.085	8.155	-0.07	1.04972	1.0483						29.13	29	29.065		19.085	9.98	0.165	0.891929	0.890725
	27.54	27.47	27.505		19.19	8.315	0.09	0.939523	0.938255						29.18	29.28	29.23		19.19	10.04	0.225	0.855595	0.85444
	27.7	28.06	27.88		19.295	8.585	0.36	0.779165	0.778113						29.29	29.46	29.375		19.295	10.08	0.265	0.832199	0.831075
			31.15			8.45		0.984295	0.982967								31.15			10.06		0.876578	0.875394

## Sheet: Experiment 3
Figure 6D RT-qPCR data - Experiment 3
Raw Ct values
Plate 1	1	2	3	4	5	6	7	8	9	10	11	12	Primers:							Plate 2	1	2	3	4	5	6	7	8	9	10	11	12	Primers:		Plate 3	1	2	3	4	5	6	7	8	9	10	11	12	Primers:
A	1	1	9	9	17	17	1	1	9	9	17	17	Gapdh							A					1	1							Sirpa		A					1	1							Stk35
B	2	2	10	10	18	18	2	2	10	10	18	18	Pdyn							B					2	2									B					2	2
C	3	3	11	11	19	19	3	3	11	11	19	19								C					3	3									C					3	3
D	4	4	12	12	20	20	4	4	12	12	20	20								D					4	4									D					4	4
E	5	5	13	13	21	21	5	5	13	13	21	21								E					5	5									E					5	5
F	6	6	14	14	22	22	6	6	14	14	22	22								F					6	6									F					6	6
G	7	7	15	15	23	23	7	7	15	15	23	23								G					7	7									G					7	7
H	8	8	16	16	24	24	8	8	16	16	24	24								H					8	8									H					8	8
																									Experiment 3															Experiment 3
	1	2	3	4	5	6	7	8	9	10	11	12									1	2	3	4	5	6	7	8	9	10	11	12				1	2	3	4	5	6	7	8	9	10	11	12
A	19.34	19.06	19.67	19.54	18.87	18.96	30.52	30.58	30.02	29.99	29.69	29.52	Gapdh						A	Cq	N/A	N/A	N/A	N/A	27.87	27.89	N/A	N/A	N/A	N/A	N/A	N/A		A	Cq	N/A	N/A	N/A	N/A	29.44	29.33	N/A	N/A	N/A	N/A	N/A	N/A
B	19.22	19.2	19.08	19.16	19.28	19.24	29.96	30.12	30.02	29.92	29.51	29.8	Pdyn						B	Cq	N/A	N/A	N/A	N/A	27.24	27.14	N/A	N/A	N/A	N/A	N/A	N/A		B	Cq	N/A	N/A	N/A	N/A	29.06	29.01	N/A	N/A	N/A	N/A	N/A	N/A
C	19.83	19.62	19.65	19.59	19.08	19.29	30.61	30.38	30.07	30.06	30.02	29.56							C	Cq	N/A	N/A	N/A	N/A	27.33	27.39	N/A	N/A	N/A	N/A	N/A	N/A		C	Cq	N/A	N/A	N/A	N/A	29.25	29.16	N/A	N/A	N/A	N/A	N/A	N/A
D	19.12	19.14	19.3	19.14	19.3	19.31	30.1	30.19	30.2	30.03	29.54	29.42							D	Cq	N/A	N/A	N/A	N/A	26.89	26.99	N/A	N/A	N/A	N/A	N/A	N/A		D	Cq	N/A	N/A	N/A	N/A	29.09	28.94	N/A	N/A	N/A	N/A	N/A	N/A
E	19.79	19.69	19.14	19.33	19.37	19.87	26.51	26.66	30.46	30.54	30.49	30.52							E	Cq	N/A	N/A	N/A	N/A	26.93	26.87	N/A	N/A	N/A	N/A	N/A	N/A		E	Cq	N/A	N/A	N/A	N/A	29.02	28.76	N/A	N/A	N/A	N/A	N/A	N/A
F	19.2	19.28	18.92	19.35	19.83	20.2	26.62	26.7	30.1	30.13	30.63	30.57							F	Cq	N/A	N/A	N/A	N/A	26.9	26.94	N/A	N/A	N/A	N/A	N/A	N/A		F	Cq	N/A	N/A	N/A	N/A	28.97	28.87	N/A	N/A	N/A	N/A	N/A	N/A
G	19.29	19.51	19.06	19.11	19.02	19.56	26.26	26.25	30.01	30.34	30.38	30.07							G	Cq	N/A	N/A	N/A	N/A	26.4	27.17	N/A	N/A	N/A	N/A	N/A	N/A		G	Cq	N/A	N/A	N/A	N/A	28.46	28.72	N/A	N/A	N/A	N/A	N/A	N/A
H	18.53	19.01	18.96	19.09	19.63	19.79	26.62	26.62	29.87	29.94	30.73	30.65							H	Cq	N/A	N/A	N/A	N/A	26.57	26.46	N/A	N/A	N/A	N/A	N/A	N/A		H	Cq	N/A	N/A	N/A	N/A	28.84	28.79	N/A	N/A	N/A	N/A	N/A	N/A
Normalized
Gapdh mRNA									Pdyn mRNA											Sirpa mRNA															Stk35 mRNA
lacZ sgRNAs	R1	R2	Average		Diff-Veh Avg	Relative Enrichment	Normalized		lacZ sgRNAs	R1	R2	Average		Gapdh Averages	Ct(samples)-Ct(Gapdh)	Diff Avg	Relative enrichment	Normalized		lacZ sgRNAs	R1	R2	Average		Gapdh Averages	Ct(samples)-Ct(Gapdh)	Diff Avg	Relative enrichment	Normalized						lacZ sgRNAs	R1	R2	Average		Gapdh Averages	Ct(samples)-Ct(Gapdh)	Diff Avg	Relative enrichment	Normalized
	19.34	19.06	19.2		-0.11625	1.08391	1.07016			30.52	30.58	30.55		19.2	11.35	0.35875	0.77984	0.770686			27.87	27.89	27.88		19.2	8.68	0.65375	0.635626	0.613917							29.44	29.33	29.385		19.2	10.185	0.34125	0.789357	0.777497
	19.22	19.2	19.21		-0.10625	1.07643	1.06277			29.96	30.12	30.04		19.21	10.83	-0.16125	1.11826	1.10513			27.24	27.14	27.19		19.21	7.98	-0.04625	1.03258	0.997312							29.06	29.01	29.035		19.21	9.825	-0.01875	1.01308	0.99786
	19.83	19.62	19.725		0.40875	0.753276	0.743716			30.61	30.38	30.495		19.725	10.77	-0.22125	1.16574	1.15206			27.33	27.39	27.36		19.725	7.635	-0.39125	1.31153	1.26674							29.25	29.16	29.205		19.725	9.48	-0.36375	1.28677	1.26743
	19.12	19.14	19.13		-0.18625	1.1378	1.12336			30.1	30.19	30.145		19.13	11.015	0.02375	0.983673	0.972126			26.89	26.99	26.94		19.13	7.81	-0.21625	1.16171	1.12203							29.09	28.94	29.015		19.13	9.885	0.04125	0.971813	0.957211
			19.3163			1.01285	1					30.3075			10.9912		1.01188	1					27.3425			8.02625		1.03536	1									29.16			9.84375		1.01525	1
Pdyn DAR sgRNAs	R1	R2	Average		Diff-Veh Avg	Relative Enrichment	Normalized		Pdyn DAR sgRNAs	R1	R2	Average		Gapdh Averages	Ct(samples)-Ct(Gapdh)	Diff Avg	Relative enrichment	Normalized		Pdyn DAR sgRNAs	R1	R2	Average		Gapdh Averages	Ct(samples)-Ct(Gapdh)	Diff Avg	Relative enrichment	Normalized						Pdyn DAR sgRNAs	R1	R2	Average		Gapdh Averages	Ct(samples)-Ct(Gapdh)	Diff Avg	Relative enrichment	Normalized
	19.79	19.69	19.74		0.42375	0.745484	0.736023			26.51	26.66	26.585		19.74	6.845	-4.14625	17.707	17.4992			26.93	26.87	26.9		19.74	7.16	-0.86625	1.82292	1.76066							29.02	28.76	28.89		19.74	9.15	-0.69375	1.61748	1.59318
	19.2	19.28	19.24		-0.07625	1.05427	1.04089			26.62	26.7	26.66		19.24	7.42	-3.57125	11.8865	11.747			26.9	26.94	26.92		19.24	7.68	-0.34625	1.27125	1.22783							28.97	28.87	28.92		19.24	9.68	-0.16375	1.1202	1.10336
	19.29	19.51	19.4		0.08375	0.943602	0.931626			26.26	26.25	26.255		19.4	6.855	-4.13625	17.5847	17.3783			26.4	27.17	26.785		19.4	7.385	-0.64125	1.55968	1.50641							28.46	28.72	28.59		19.4	9.19	-0.65375	1.57325	1.54961
	18.53	19.01	18.77		-0.54625	1.46029	1.44175			26.62	26.62	26.62		18.77	7.85	-3.14125	8.82288	8.71932			26.57	26.46	26.515		18.77	7.745	-0.28125	1.21525	1.17374							28.84	28.79	28.815		18.77	10.045	0.20125	0.869797	0.856728
			19.2875			1.05091	1.03757					26.53			7.2425		14.0003	13.8359					26.78			7.4925		1.46727	1.41716									28.8038			9.51625		1.29518	1.27572
