# Supplementary material for: Temporally specific gene expression and chromatin remodeling programs regulate a conserved Pdyn enhancer
Source: eLife. 2023 Nov 8;12:RP89993. doi: 10.7554/eLife.89993 (PMC10631760; doi:10.7554/eLife.89993)
Supplement: Figure 7—source data 1. [file elife-89993-fig7-data1.xlsx]

## Sheet: Experiment 1
Figure 7H RT-qPCR data - Experiment 1
Raw Ct values
Plate 1	1	2	3	4	5	6	7	8	9	10	11	12	Primers:			Plate 2	1	2	3	4	5	6	7	8	9	10	11	12	Primers:
A	20.01	19.89	N/A	N/A	N/A	N/A	N/A	N/A	N/A	N/A	N/A	N/A	RPL13a			A	29.82	29.93	N/A	N/A	N/A	N/A	N/A	N/A	N/A	N/A	N/A	N/A	PDYN
B	20.09	20.06	N/A	N/A	N/A	N/A	N/A	N/A	N/A	N/A	N/A	N/A				B	30.04	29.99	N/A	N/A	N/A	N/A	N/A	N/A	N/A	N/A	N/A	N/A
C	20.16	19.99	N/A	N/A	N/A	N/A	N/A	N/A	N/A	N/A	N/A	N/A				C	29.84	29.72	N/A	N/A	N/A	N/A	N/A	N/A	N/A	N/A	N/A	N/A
D	20.57	20.3	N/A	N/A	N/A	N/A	N/A	N/A	N/A	N/A	N/A	N/A				D	N/A	N/A	N/A	N/A	N/A	N/A	N/A	N/A	N/A	N/A	N/A	N/A
E	20.17	19.88	N/A	N/A	N/A	N/A	N/A	N/A	N/A	N/A	N/A	N/A				E	N/A	N/A	29.66	29.77	N/A	N/A	N/A	N/A	N/A	N/A	N/A	N/A
F	20.23	19.92	N/A	N/A	N/A	N/A	N/A	N/A	N/A	N/A	N/A	N/A				F	N/A	N/A	29.23	29.77	N/A	N/A	N/A	N/A	N/A	N/A	N/A	N/A
G	N/A	N/A	N/A	N/A	N/A	N/A	N/A	N/A	N/A	N/A	N/A	N/A				G	N/A	N/A	29.11	29.33	N/A	N/A	N/A	N/A	N/A	N/A	N/A	N/A
H	N/A	N/A	N/A	N/A	N/A	N/A	N/A	N/A	N/A	N/A	N/A	N/A				H	N/A	N/A	N/A	N/A	N/A	N/A	N/A	N/A	N/A	N/A	N/A	N/A
Normalized
RPL13a mRNA									PDYN mRNA
lacZ sgRNA	R1	R2	Average		Diff-Veh Avg	Relative Enrichment	Normalized		lacZ sgRNA	R1	R2	Average		Gapdh Averages	Ct(samples)-Ct(Gapdh)	Diff Avg	Relative enrichment	Normalized
	20.01	19.89	19.95		-0.0833333	1.05946	1.05857			29.82	29.93	29.875		19.95	9.925	0.0683333	0.953739	0.951055
	20.09	20.06	20.075		0.0416667	0.971532	0.970714			30.04	29.99	30.015		20.075	9.94	0.0833333	0.943874	0.941218
	20.16	19.99	20.075		0.0416667	0.971532	0.970714			29.84	29.72	29.78		20.075	9.705	-0.151667	1.11085	1.10773
			20.0333			1.00084	1					29.89			9.85667		1.00282	1
Pdyn DAR sgRNAs	R1	R2	Average		Diff-Veh Avg	Relative Enrichment	Normalized		Pdyn DAR sgRNAs	R1	R2	Average		Gapdh Averages	Ct(samples)-Ct(Gapdh)	Diff Avg	Relative enrichment	Normalized
	20.57	20.3	20.435		0.401667	0.756983	0.756346			29.66	29.77	29.715		20.435	9.28	-0.576667	1.4914	1.4872
	20.17	19.88	20.025		-0.00833333	1.00579	1.00495			29.23	29.77	29.5		20.025	9.475	-0.381667	1.30285	1.29918
	20.23	19.92	20.075		0.0416667	0.971532	0.970714			29.11	29.33	29.22		20.075	9.145	-0.711667	1.63769	1.63309
			20.1783			0.911436	0.910669					29.4783			9.3		1.47731	1.47316

## Sheet: Experiment 2
Figure 7H RT-qPCR data - Experiment 2
Raw Ct values
Plate 1	1	2	3	4	5	6	7	8	9	10	11	12	Primers:			Plate 2	1	2	3	4	5	6	7	8	9	10	11	12	Primers:
A	19.52	19.29	N/A	N/A	N/A	N/A	N/A	N/A	N/A	N/A	N/A	N/A	RPL13a			A	29.8	30.18	N/A	N/A	N/A	N/A	N/A	N/A	N/A	N/A	N/A	N/A	PDYN
B	19.57	19.23	N/A	N/A	N/A	N/A	N/A	N/A	N/A	N/A	N/A	N/A				B	29.61	29.85	N/A	N/A	N/A	N/A	N/A	N/A	N/A	N/A	N/A	N/A
C	19.33	19.05	N/A	N/A	N/A	N/A	N/A	N/A	N/A	N/A	N/A	N/A				C	29.51	29.65	N/A	N/A	N/A	N/A	N/A	N/A	N/A	N/A	N/A	N/A
D	19.66	19.42	N/A	N/A	N/A	N/A	N/A	N/A	N/A	N/A	N/A	N/A				D	N/A	N/A	N/A	N/A	N/A	N/A	N/A	N/A	N/A	N/A	N/A	N/A
E	19.42	19.57	N/A	N/A	N/A	N/A	N/A	N/A	N/A	N/A	N/A	N/A				E	N/A	N/A	29.99	29.72	N/A	N/A	N/A	N/A	N/A	N/A	N/A	N/A
F	19.52	19.68	N/A	N/A	N/A	N/A	N/A	N/A	N/A	N/A	N/A	N/A				F	N/A	N/A	29.75	29.95	N/A	N/A	N/A	N/A	N/A	N/A	N/A	N/A
G	N/A	N/A	N/A	N/A	N/A	N/A	N/A	N/A	N/A	N/A	N/A	N/A				G	N/A	N/A	29.26	29.43	N/A	N/A	N/A	N/A	N/A	N/A	N/A	N/A
H	N/A	N/A	N/A	N/A	N/A	N/A	N/A	N/A	N/A	N/A	N/A	N/A				H	N/A	N/A	N/A	N/A	N/A	N/A	N/A	N/A	N/A	N/A	N/A	N/A
Normalized
RPL13a mRNA									PDYN mRNA
lacZ sgRNA	R1	R2	Average		Diff-Veh Avg	Relative Enrichment	Normalized		lacZ sgRNA	R1	R2	Average		Gapdh Averages	Ct(samples)-Ct(Gapdh)	Diff Avg	Relative enrichment	Normalized
	19.52	19.29	19.405		0.0733333	0.950439	0.948114			29.8	30.18	29.99		19.405	10.585	0.15	0.90125	0.898726
	19.57	19.23	19.4		0.0683333	0.953739	0.951406			29.61	29.85	29.73		19.4	10.33	-0.105	1.07549	1.07248
	19.33	19.05	19.19		-0.141667	1.10318	1.10048			29.51	29.65	29.58		19.19	10.39	-0.045	1.03168	1.02879
			19.3317			1.00245	1					29.7667			10.435		1.00281	1
Pdyn DAR sgRNAs	R1	R2	Average		Diff-Veh Avg	Relative Enrichment	Normalized		Pdyn DAR sgRNAs	R1	R2	Average		Gapdh Averages	Ct(samples)-Ct(Gapdh)	Diff Avg	Relative enrichment	Normalized
	19.66	19.42	19.54		0.208333	0.865537	0.863419			29.99	29.72	29.855		19.54	10.315	-0.12	1.08673	1.08369
	19.42	19.57	19.495		0.163333	0.89296	0.890775			29.75	29.95	29.85		19.495	10.355	-0.08	1.05702	1.05406
	19.52	19.68	19.6		0.268333	0.830278	0.828247			29.26	29.43	29.345		19.6	9.745	-0.69	1.61328	1.60876
			19.545			0.862925	0.860814					29.6833			10.1383		1.25235	1.24884
